# Supplementary material for: Age at Menarche and Risk of Gestational Diabetes Mellitus: A Prospective Cohort Study Among 27,482 Women
Source: Oxford University Press journal article supplement (doi:10.2337/dc15-2011), 2016-01-26
Supplement: dc152011supplementarydata.pdf [file dc152011supplementarydata.pdf]

SUPPLEMENTARY DATA

**Supplementary Table 1.** Childhood and adulthood characteristics according to age at menarche among 27,482 women in the Nurses' Health Study II

|                                           | Age at menarche        |                       |                       |                        | P value |
|-------------------------------------------|------------------------|-----------------------|-----------------------|------------------------|---------|
|                                           | ≤11 years<br>(N=5,920) | 12 years<br>(N=8,151) | 13 years<br>(N=7,727) | ≥14 years<br>(N=5,684) |         |
| <b>Adulthood characteristics</b>          |                        |                       |                       |                        |         |
| Age at pregnancy                          | 34.3 (3.9)             | 34.0 (3.8)            | 34.1 (3.8)            | 33.9 (3.9)             |         |
| Caucasian, %                              | 91                     | 92                    | 93                    | 93                     | <0.0001 |
| Currently Married, %                      | 83                     | 83                    | 83                    | 82                     | 0.62    |
| Current smoker, %                         | 9                      | 9                     | 9                     | 8                      | 0.16    |
| Alcohol (grams/day)                       | 2.9 (5.1)              | 3.4(6.0)              | 3.4 (5.3)             | 3.6 (5.8)              | <0.0001 |
| Family history of diabetes, %             | 14                     | 14                    | 12                    | 11                     | <0.0001 |
| Oral contraceptive use, %                 | 85                     | 84                    | 84                    | 83                     | 0.008   |
| Nulliparous, %                            | 38                     | 38                    | 39                    | 40                     | 0.02    |
| AHEI-2010 healthy diet score              | 55.8 (10.7)            | 55.5 (10.4)           | 55.7 (10.57)          | 55.8 (10.6)            | 0.93    |
| Total physical activity (METs/week)       | 24.3 (33.0)            | 24.2 (32.6)           | 25.0 (34.6)           | 26.9 (38.8)            | <0.0001 |
| Overweight or obese, %                    | 38                     | 29                    | 23                    | 18                     | <0.0001 |
| BMI before pregnancy (kg/m <sup>2</sup> ) | 25.1 (5.2)             | 24.0 (4.5)            | 23.3 (4.1)            | 22.5 (3.8)             | <0.0001 |
| Weight gain since age 18 years (lb)       | 3.2 (4.1)              | 2.8 (3.5)             | 2.5 (3.2)             | 2.3 (2.9)              | <0.0001 |

SUPPLEMENTARY DATA

| <b>Childhood and early life characteristics</b> |            |            |            |            |         |
|-------------------------------------------------|------------|------------|------------|------------|---------|
| BMI at age 18 (kg/m <sup>2</sup> )              | 21.9 (3.5) | 21.2 (3.0) | 20.8 (2.8) | 20.3 (2.7) | <0.0001 |
| Birth weight                                    |            |            |            |            |         |
| <5.5, lbs %                                     | 7          | 6          | 5          | 5          |         |
| 5.5-7 lbs, %                                    | 27         | 25         | 26         | 25         |         |
| 7-8.5, %                                        | 38         | 42         | 41         | 41         |         |
| 8.5-10.0, %                                     | 11         | 11         | 11         | 12         |         |
| 10.0+, %                                        | 1          | 1          | 1          | 1          | <0.0001 |
| Somatotype at age 5                             |            |            |            |            |         |
| 1                                               | 18         | 21         | 24         | 28         |         |
| 2                                               | 30         | 34         | 36         | 37         |         |
| 3                                               | 26         | 25         | 23         | 20         |         |
| 4                                               | 15         | 12         | 11         | 9          |         |
| 5+                                              | 8          | 6          | 5          | 4          | <0.0001 |
| Somatotype at age 10                            |            |            |            |            |         |
| 1                                               | 10         | 15         | 19         | 25         |         |
| 2                                               | 27         | 32         | 36         | 38         |         |
| 3                                               | 25         | 25         | 22         | 20         |         |
| 4                                               | 21         | 16         | 13         | 10         |         |
| 5+                                              | 15         | 11         | 8          | 6          | <0.0001 |

Values are presented as mean (SD) or percentages and are standardized to the age distribution of the study population.  
 BMI-body mass index
